# Supplementary material
Source: PubMed Central journal article supplement (PMC4865416)
Supplement: NIHMS739263-supplement-Additional_File_02.pdf [file NIHMS739263-supplement-Additional_File_02.pdf]

## Additional file 2: Comparison of results with and without RPP correction

The paper shows myocardial blood flow (MBF) and myocardial perfusion reserve (MPR) after normalizing the resting MBF values with the rate-pressure product (RPP). This additional file shows the variation of RPP and perfusion results with and without normalizing the resting studies for RPP. Figure A2.1 shows a plot comparing the RPP values of the 10 subjects between scan 1 and scan 2.

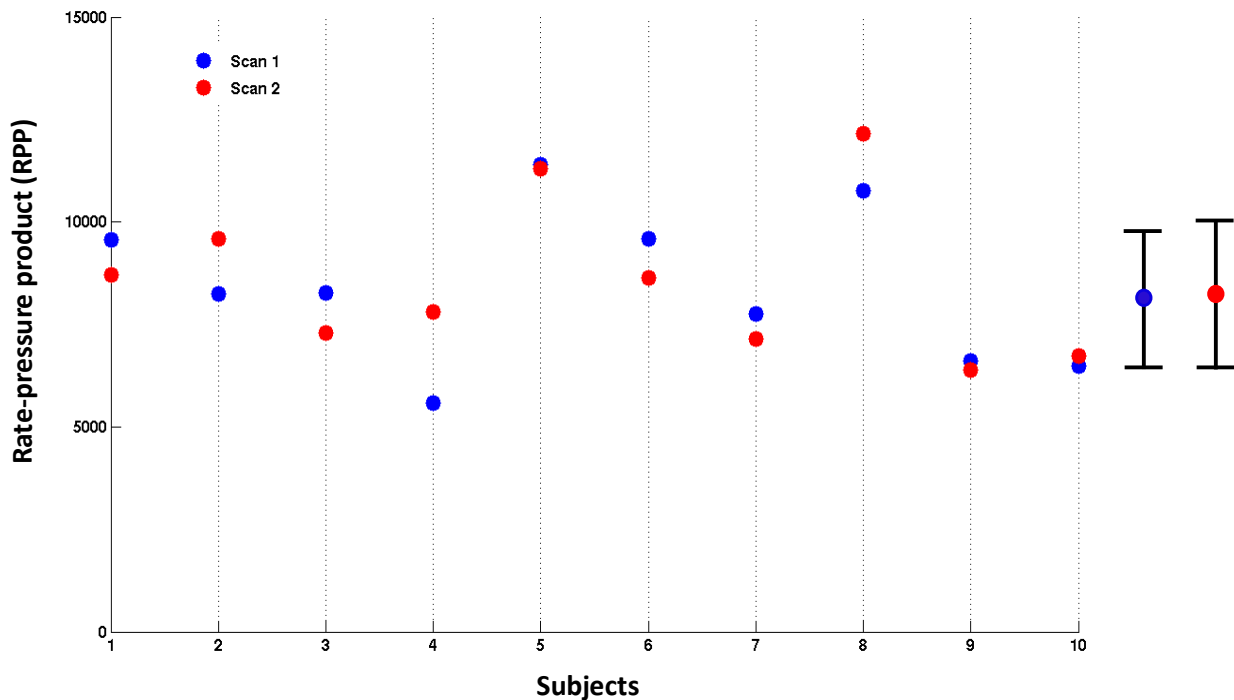

Figure A2.1: A comparison of the RPP values between scan 1 and scan 2 for all 10 subjects

It is seen from Figure A2.1 that the RPP values were similar between scans for each subject. A comparison of the segmental resting MBF values and the segmental MPR values with and without RPP normalization was also done. Table TA2.1a shows a summary of the segmental MBF and MPR values for the self-gated near-systole dataset. Similarly, Table TA2.1b shows a summary of the segmental MBF and MPR values for the self-gated near-diastole dataset.

| <b>a)</b>          | <b>Mean <math>\pm</math> SD (Scan 1)</b> | <b>Mean <math>\pm</math> SD (Scan 2)</b> | <b>CoV (%)</b> |
|--------------------|------------------------------------------|------------------------------------------|----------------|
| <b>Rest RPP</b>    | 0.7 $\pm$ 0.2                            | 0.7 $\pm$ 0.2                            | 22.7           |
| <b>Rest No RPP</b> | 0.6 $\pm$ 0.2                            | 0.6 $\pm$ 0.2                            | 26             |
| <b>MPR RPP</b>     | 2.6 $\pm$ 0.7                            | 2.5 $\pm$ 0.8                            | 25             |
| <b>MPR No RPP</b>  | 2.7 $\pm$ 1                              | 2.6 $\pm$ 1.2                            | 31.6           |

| <b>b)</b>          | <b>Mean <math>\pm</math> SD (Scan 1)</b> | <b>Mean <math>\pm</math> SD (Scan 2)</b> | <b>CoV (%)</b> |
|--------------------|------------------------------------------|------------------------------------------|----------------|
| <b>Rest RPP</b>    | 0.7 $\pm$ 0.3                            | 0.7 $\pm$ 0.3                            | 44.9           |
| <b>Rest No RPP</b> | 0.6 $\pm$ 0.2                            | 0.6 $\pm$ 0.3                            | 53.4           |
| <b>MPR RPP</b>     | 2.9 $\pm$ 0.9                            | 3 $\pm$ 1.2                              | 47.2           |
| <b>MPR No RPP</b>  | 3 $\pm$ 1.6                              | 3 $\pm$ 1.8                              | 70.1           |

Table TA2.1: A summary of the segmental resting MBF and segmental MPR values with and without RPP normalization for a) self-gated near-systole and b) self-gated near-diastole

It is seen from Table TA2.1 that the CoV improves after normalizing the resting MBF values by the rate-pressure product.
